# Supplementary material for: LINC01198 promotes proliferation and temozolomide resistance in a NEDD4-1-dependent manner, repressing PTEN expression in glioma
Source: publisher site journal article supplement (doi:10.18632/aging.102162), 2019-08-30
Supplement: Supplementary file [file aging-v11i16-102162-supplementary-material-SD1.pdf]

**SUPPLEMENTARY FIGURES**

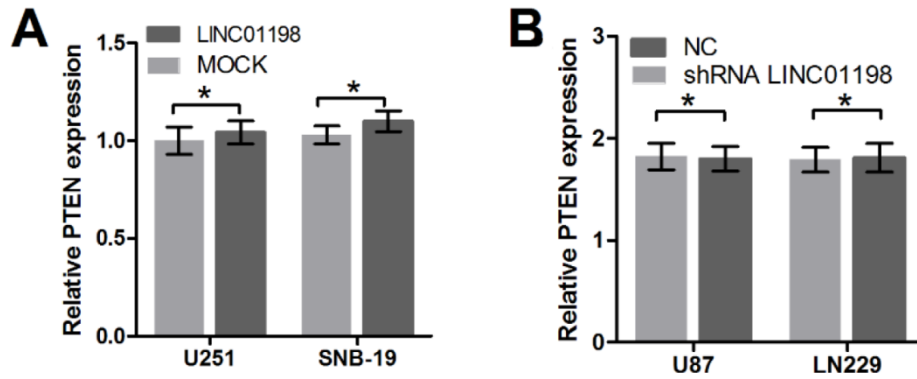

Supplementary Figure 1. Increased or decreased LINC01198 did not affected PTEN RNA expression in glioma cell lines.

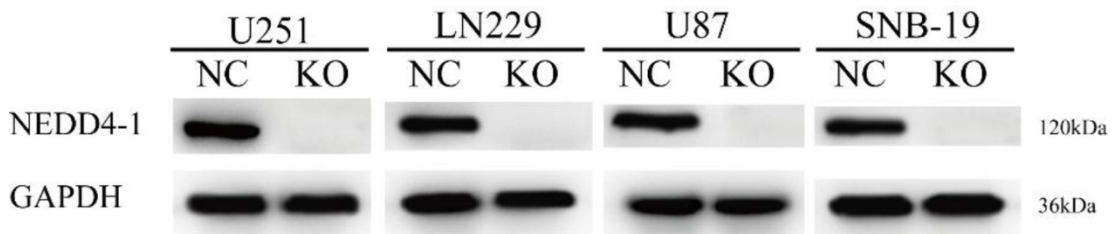

Supplementary Figure 2. Western blotting was used to verify the CRISPR/Cas9-induced NEDD4-1 knockout efficiency.

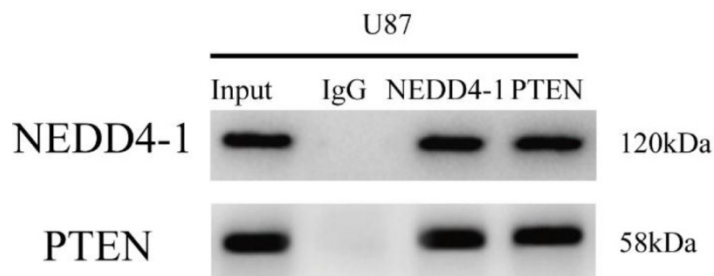

Supplementary Figure 3. Interplay between NEDD4-1 and PTEN in glioma U87 cells.
