# Supplementary material for: LINC01198 promotes proliferation and temozolomide resistance in a NEDD4-1-dependent manner, repressing PTEN expression in glioma
Source: publisher site journal article supplement (doi:10.18632/aging.102162), 2019-08-30
Supplement: Supplementary file [file aging-v11i16-102162-supplementary-material-SD2.pdf]

## SUPPLEMENTARY TABLES

**Supplementary Table 1. Sequence of primers for qRT-PCR.**

| Gene      | Forward primer (5'-3') | Reverse primer(5'-3') |
|-----------|------------------------|-----------------------|
| LINC01198 | ATGGAGGTGATCACCGTGTAC  | GCTGGACGATAACAATGGCAG |
| GAPDH     | GGGGCTCTCCAGAACATCATCC | ACGCCTGCTTCACCACTCTT  |

Abbreviations: qRT-PCR, quantitative real-time polymerase chain reaction.

**Supplementary Table 2. Antibody for western blotting and RIP used in this study.**

| Antibody                              | Company  | Cat No.  |
|---------------------------------------|----------|----------|
| PTEN                                  | Abcam    | ab79156  |
| NEDD4-1                               | Abcam    | ab240753 |
| AKT                                   | Abcam    | ab179463 |
| pAKT                                  | Abcam    | ab8805   |
| HRP-labeled Goat Anti-Rabbit IgG(H+L) | Beyotime | A0208    |
| HRP-labeled Goat Anti-mouse IgG(H+L)  | Beyotime | A0216    |
| GAPDH                                 | Abcam    | ab8245   |

**Supplementary Table 3. Predicted the interactions between LINC01198 and RNA-binding proteins.**

| GENE    | Prediction using RF classifier | Prediction using SVM classifier |
|---------|--------------------------------|---------------------------------|
| PTEN    | 0.65                           | 0.89                            |
| NEDD4-1 | 0.8                            | 0.95                            |
| IGF2BP1 | 0.9                            | 0.68                            |
| IGF2BP3 | 0.9                            | 0.85                            |
| BCL2    | 0.9                            | 0.78                            |
| BDNF    | 0.85                           | 0.81                            |
| PTPN1   | 0.75                           | 0.87                            |
| GPIHBP1 | 0.75                           | 0.8                             |
| PAX3    | 0.9                            | 0.76                            |
| HMGA2   | 0.8                            | 0.65                            |
| HMGB1   | 0.75                           | 0.81                            |
| LRIG3   | 0.85                           | 0.94                            |
| PTBP1   | 0.65                           | 0.87                            |
